# Supplementary material
Source: PubMed Central journal article supplement (PMC3160042)
Supplement: supp_tpc.111.083436_Nagato_Supplemental_Data_final.pdf [file supp_tpc.111.083436_Nagato_Supplemental_Data_final.pdf]

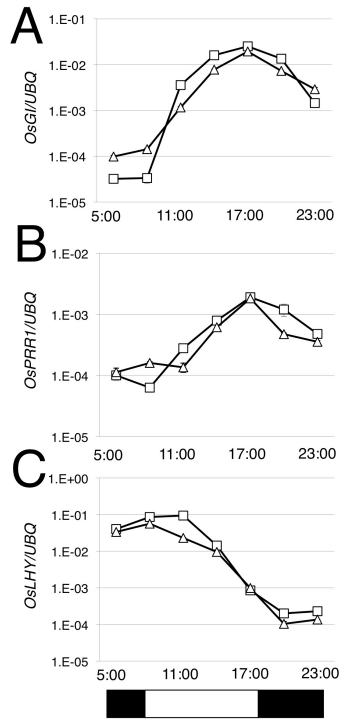

Supplemental Figure 1. Circadian clock-related gene expression under short day conditions.

(A) *Os GI*, (B) *Os PRR1*, (C) *Os LHY*. Square: wild type, and triangle: *pps-1*. Each value is the average of three independent real-time PCR assays. Vertical bars indicate SD.

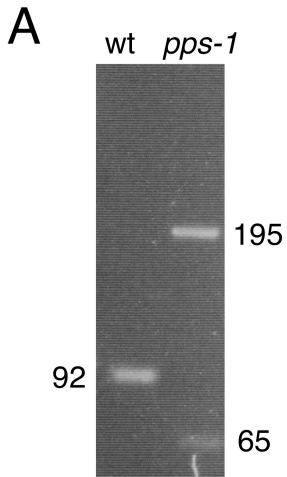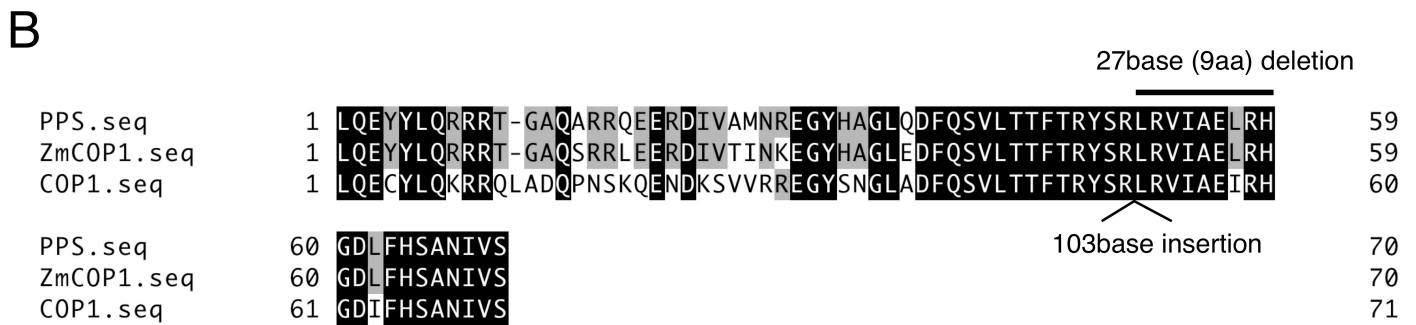

Supplemental Figure 2. Detection of *PPS* transcripts.

(A) RT-PCR of *PPS* transcripts in wild type (*wt*) and *pps-1*. The numbers indicate the length of nucleotides in wild type and *pps-1* transcripts. (B) Amino acid alignment of rice, maize and Arabidopsis COP1 orthologs. Two types of irregular transcripts in *pps-1* are indicated in amino acid alignment.

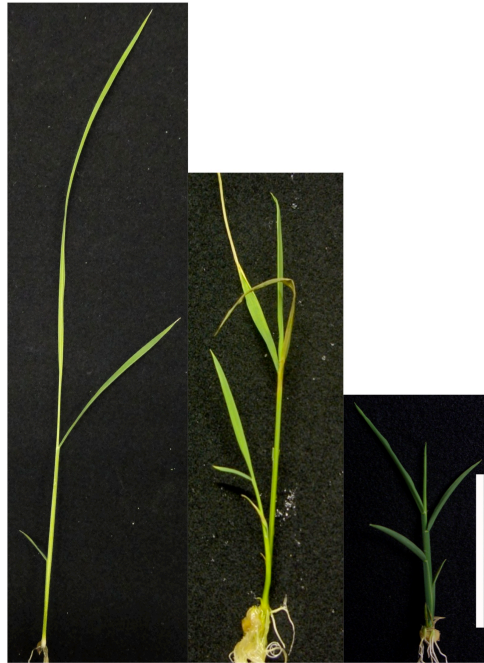

Supplemental Figure 3. Complementation test of *pps-1*.  
Left: wild type, middle: *pps-1* introduced with *pACT:PPS* that is *Os02g53140.1* cDNA under *ACTIN* promoter and right: *pps-1* mutant. Bar = 5 cm.

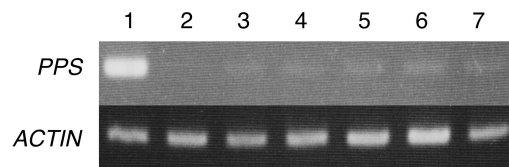

Supplemental Figure 4. RT-PCR analysis of *PPS* expression. 1: 4th leaf, 2: 1-week-old shoot apex, 3: 3-week-old shoot apex, 4: 5-week-old shoot apex, 5: young panicle at primary rachis branch-differentiation stage, 6: young panicle at secondary rachis branch-differentiation stage, and 7: young panicle at floral organ-differentiation stage.

**Supplemental Table 1.** . List of primers used in this study.

Primers for RT-PCR

---

| Gene name   | Primers                     |
|-------------|-----------------------------|
| <i>CAB</i>  | 5'-ATGTTTCGGCTTCTTCGTCCA-3' |
|             | 5'-CATCTTCCCCAACCCAAAGA-3'  |
| <i>PPS</i>  | 5'-GGAGATCTGTTTCACTCTG-3'   |
|             | 5'-TACCCTCATAGTCGCTGCTT-3'  |
| <i>ACT1</i> | 5'-TCCATCTTGGCATCTCTCAG-3'  |
|             | 5'-GTACCCGCATCAGGCATCTG-3'  |

---

Primers for constructs in plant transformation

---

| Construct name  | Primers                         |
|-----------------|---------------------------------|
| <i>pACT:PPS</i> | 5'-AATTCTAGACGCCAGTCGC-3'       |
|                 | 5'-CTATGCACATTTTCGAGCCCGGAAA-3' |

---

Primers and probes for quantitative real-time PCR

---

| Gene name   | Primers                                         |
|-------------|-------------------------------------------------|
| <i>ACT1</i> | 5'-GCTATGTACGTCGCCATCCA-3'                      |
|             | 5'-GCTGACACCATCACCAGAGT-3'                      |
|             | 5'-CAATACCTGTGGTAC GACCACTGGCATAACAG-3' (Probe) |

---

---

|                |                                     |         |
|----------------|-------------------------------------|---------|
| <i>PPS</i>     | 5'-GCTATGTACGTCGCCATCCA-3'          |         |
|                | 5'-GCTGACACCATCACCAGAGT-3'          |         |
|                | 5'-TCCACCAATGAG CTT GCG TCT GCA-3'  | (Probe) |
| <i>GA2ox4</i>  | 5'-TTGCAGGTTCTGACCAATGG-3'          |         |
|                | 5'-AATGGTGCAATCCTCTGTGCTA-3'        |         |
|                | 5'-CCTTCATCTACTTTG GAGGGCCACCG-3'   | (Probe) |
| <i>GA3ox2</i>  | 5'-CGCCTCTGGCCCAAGT-3'              |         |
|                | 5'-CTCAAGAACAACCTCAGCAACTC-3'       |         |
|                | 5'-CGACGACTACCTCCT CTTCTGTGACGTG-3' | (Probe) |
| <i>GA20ox2</i> | 5'-GCCAATGGGGAGGGTGT-3'             |         |
|                | 5'-CCATGATCGTCAGCGACA-3'            |         |
|                | 5'-CCAGAAGTACTGCGAGGAGATGAAGGA-3'   | (Probe) |
| <i>Hd3a</i>    | 5'-GCTAACGATGATCCCGAT-3'            |         |
|                | 5'-CCTGCAATGTATAGCATGC-3'           |         |
|                | 5'-CTGCTGCATGCTCACTATCATCATCC-3'    | (Probe) |
| <i>RFT</i>     | 5'-CGTCCATGGTGACCCAACA-3'           |         |
|                | 5'-CCGGGTCTACCATCACGAGT-3'          |         |
|                | 5'-CGGTGGCAATGACATGAGGACGTTC-3'     | (Probe) |
| <i>RAP1B</i>   | 5'-CCACCAAGGGCAAGCTCTAC-3'          |         |
|                | 5'-AGCGCTCATAACGTTCAAGGA-3'         |         |
|                | 5'-AGTACGCCACCGACTCATGTATGGACAAA-3' | (Probe) |

---

---

|                |                                   |         |
|----------------|-----------------------------------|---------|
| <i>UBQ</i>     | 5'-GAGCCTCTGTTCGTCAAGTA-3'        |         |
|                | 5'-ACTCGATGGTCCATTAACC-3'         |         |
|                | 5'-TTGTGGTGCTGATGTCTACTTGTGTC-3'  | (Probe) |
| <i>Os GI</i>   | 5'-GGTGAGGCTGAAACAATGTCAC-3'      |         |
|                | 5'-TCTCCCGAAATGCAGATGTCT-3'       |         |
|                | 5'-AAGCGCATCCACAACCTTTCTCCAACC-3' | (Probe) |
| <i>Os PRR1</i> | 5'-ACCCATGTGTGGCGGC-3'            |         |
|                | 5'-GCCAACTCGAAATTGTCATTGAA-3'     |         |
|                | 5'-CGGATGCTTGGTTTGTTCGGAGAAAAA-3' | (Probe) |
| <i>Os LHY</i>  | 5'-CTGTTCAGTAGAGAAAGGCTTCCC-3'    |         |
|                | 5'-TCGATGCTTCGCTCTCAAGACG-3'      |         |
|                | 5'-TCTCCTCCGCAAGTAGAAGGATCA-3'    | (Probe) |
| <i>ACT-2</i>   | 5'-GGCAAGTCATCACGATTGG-3'         |         |
|                | 5'-CAGCTTCCATTCCCACAAAC-3'        |         |

---

Primers for map-based cloning of *PPS*.

|              |         |                            |
|--------------|---------|----------------------------|
| K0453A02_R-K | CAPS    | 5'-CTTCTTGGCCTTGTACTTGG-3' |
|              | EcoT22I | 5'-TGGTACGACGTCAAGTACGT-3' |
| K0122C12_R-K | STS     | 5'-CGATGACTACTCTGGGCTTT-3' |
|              |         | 5'-TTGTACCTGATACCTCGAGG-3' |

Primers for ratio of *PPS* transcripts in *pps-1*

|                  |                            |
|------------------|----------------------------|
| PPS-transcript-F | 5'-GAGGATTTCCAGTCTGTGCT-3' |
| PPS-transcript-R | 5'-GCAGAGTGAAACAGATCTCC-3' |
